# Supplementary material for: Adolescent oligodendrogenesis and myelination restrict experience-dependent neuronal plasticity in adult visual cortex
Source: PubMed Central journal article supplement — bioRxiv. 2023 Sep 30:2023.09.29.560231. Preprint. [Version 1] doi: 10.1101/2023.09.29.560231 (PMC10557765; doi:10.1101/2023.09.29.560231), 2023-09-30
Supplement: media-1.pdf [file media-1.pdf]

Supplementary Files for Xin et al., 2023 (bioRxiv)

A NG2CreER:tau-mGFP visual cortex

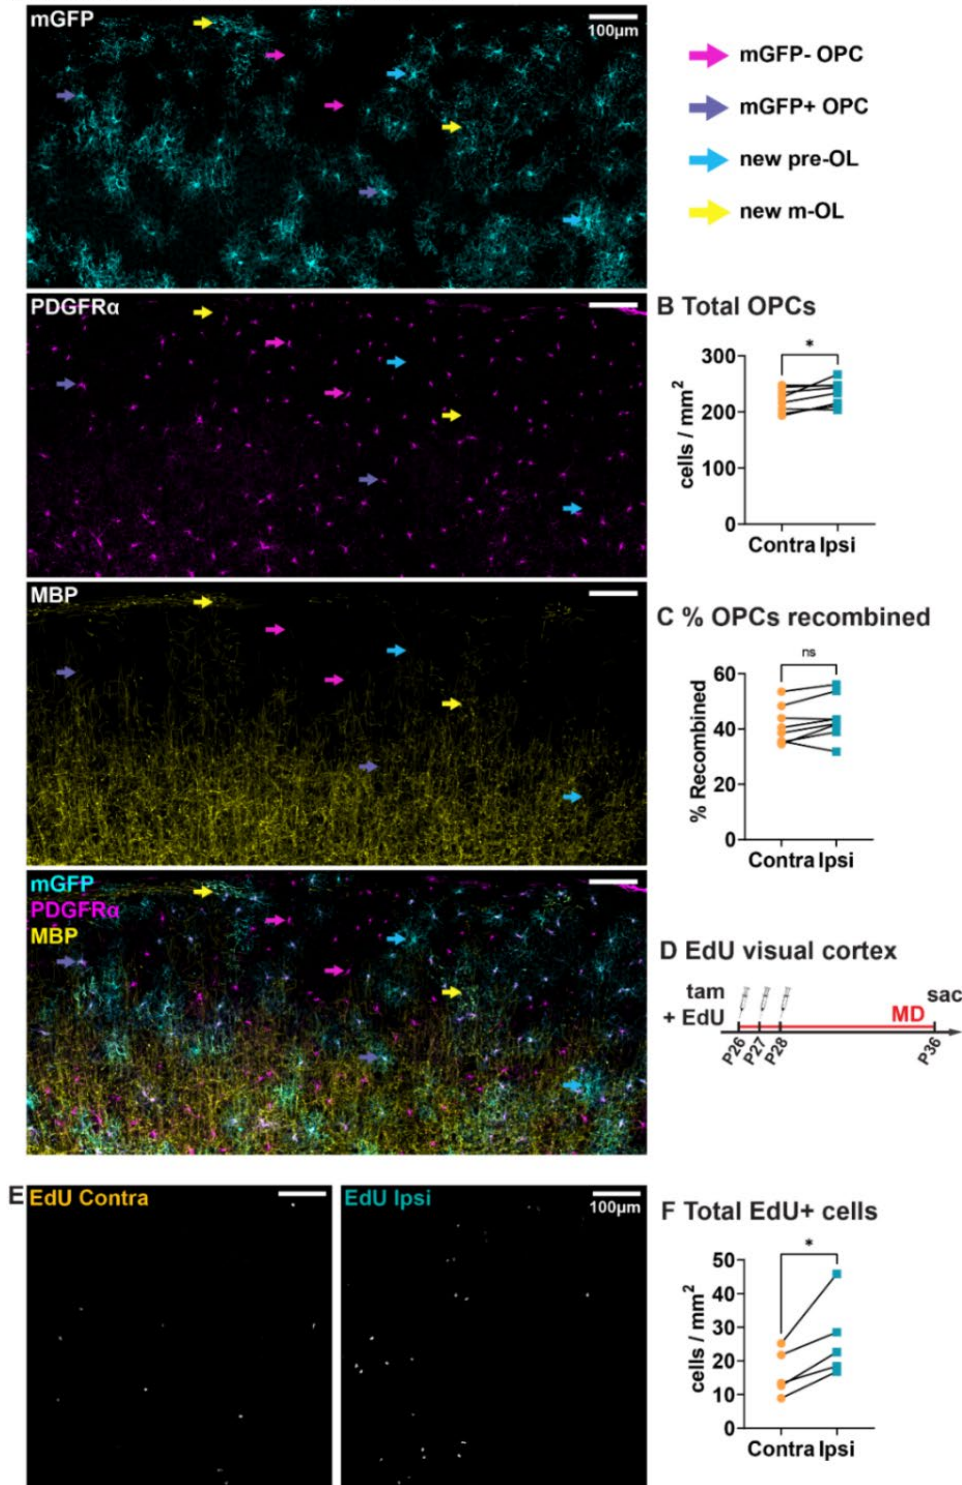

Fig. S1.

**Tracking adolescent oligodendroglial dynamics using NG2CreER:tau-mGFP mice.** (A) Example image from visual cortex. OPC = oligodendrocyte precursor cell, pre-OL = pre-myelinating oligodendrocyte, m-OL = mature oligodendrocyte. (B) Total PDGFR $\alpha$ <sup>+</sup> OPCs per hemisphere. Contra = hemisphere contralateral to the deprived eye, ipsi = hemisphere ipsilateral to the deprived eye. (C) Percentage of PDGFR $\alpha$ <sup>+</sup> OPCs that were mGFP<sup>+</sup>. (D) Timeline of EdU injections. (E, F) Example images and quantification of total EdU<sup>+</sup> cells in both hemispheres of visual cortex. Statistical details in Table S1. \* $p < 0.05$ , ns = not significant.

## Myrf cKO visual cortex

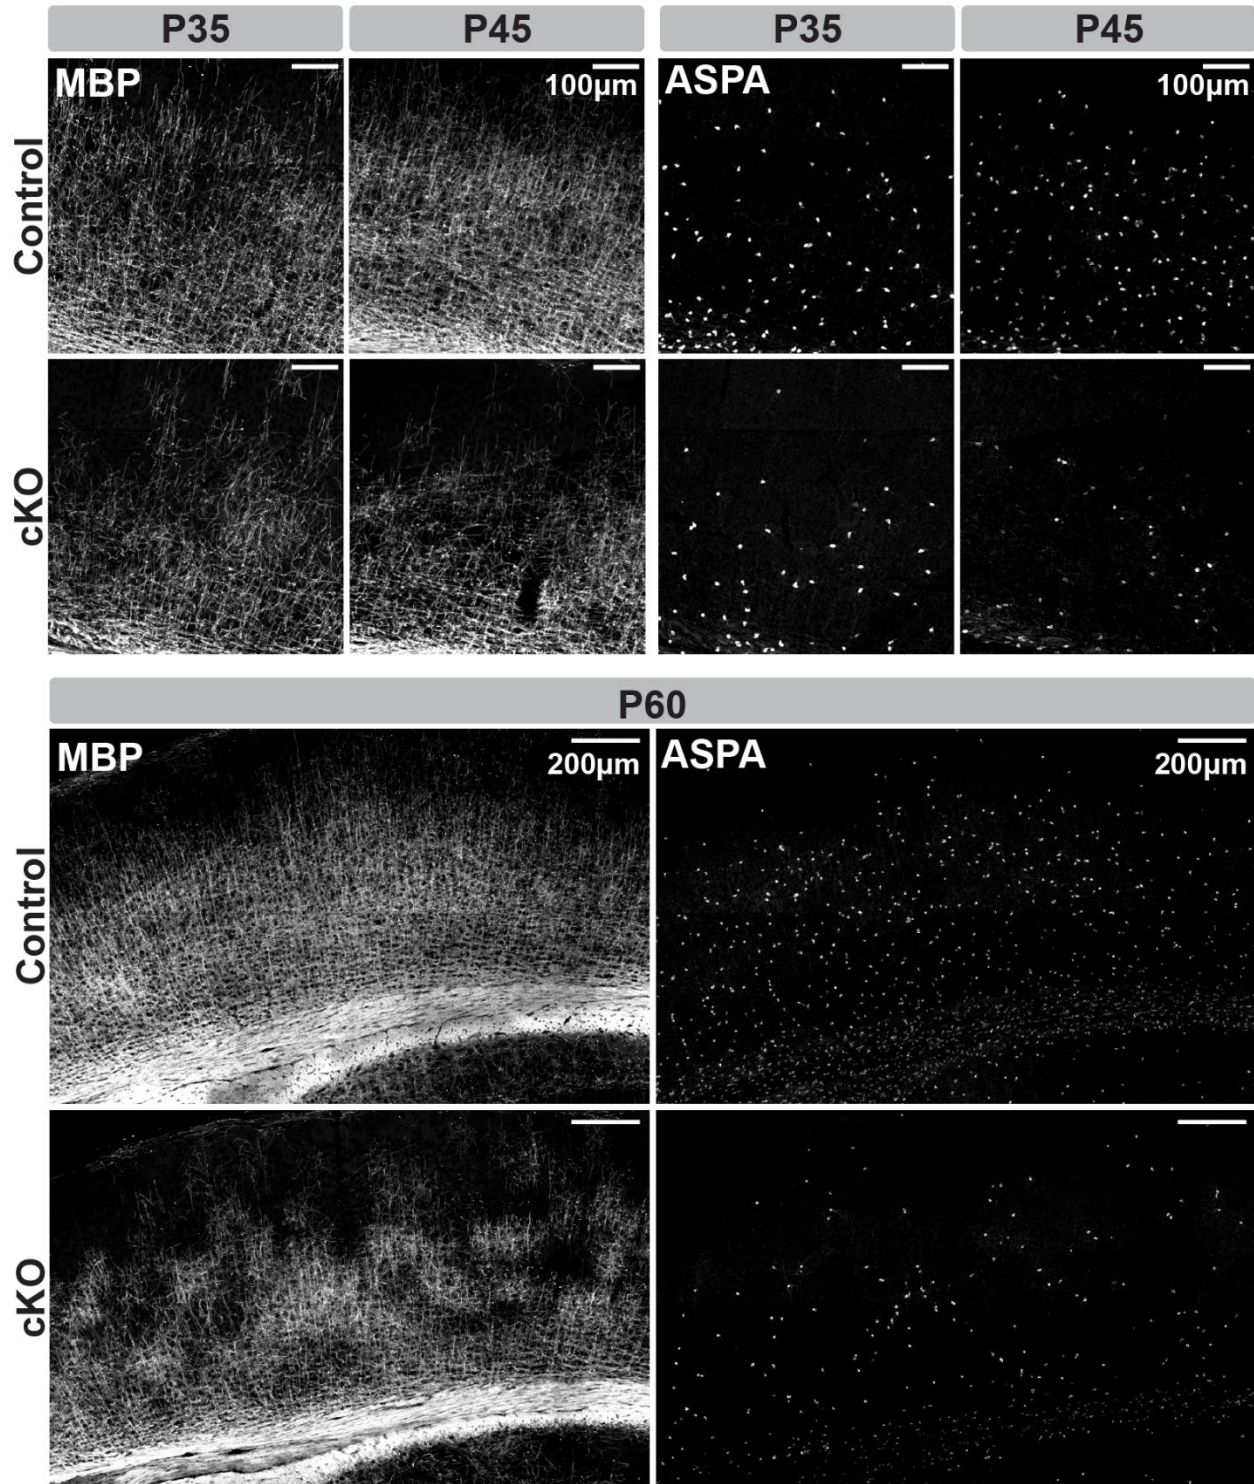

Fig. S2.

**OPC-specific deletion of Myrf in adolescence impairs oligodendrogenesis and myelination in visual cortex.** Example images of myelin (MBP) and mature oligodendrocytes (ASPA) in visual cortex of control and Myrf cKO mice at P35, P45, and P60.



### A Myrf cKO adult optic nerve

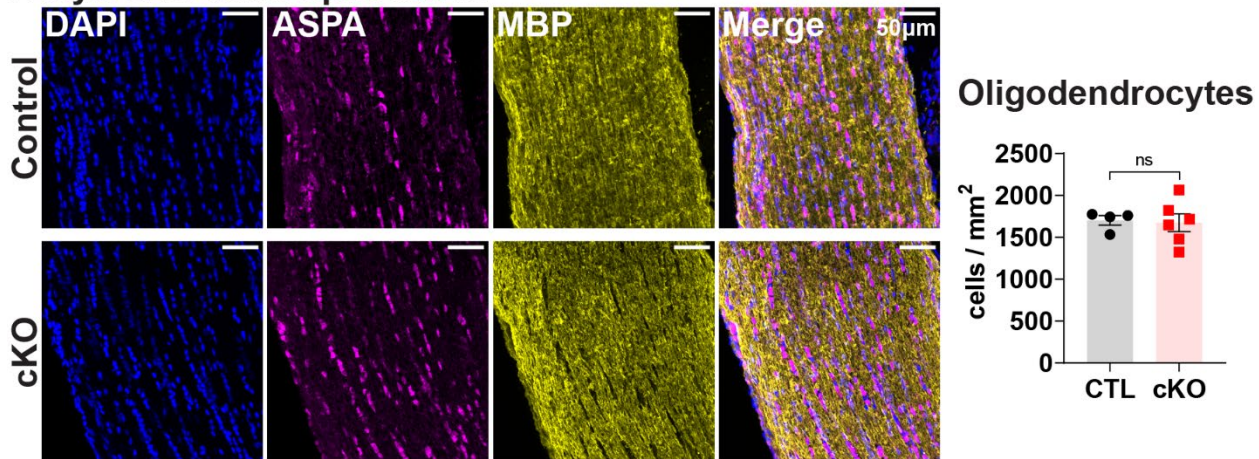

### B Myrf cKO adult lateral geniculate nucleus

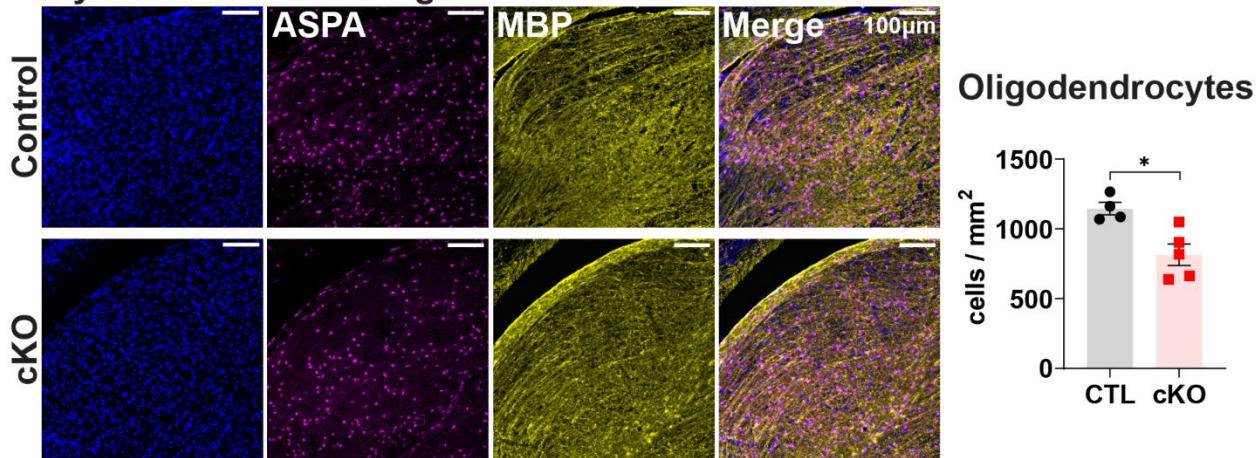

Fig. S3.

**Oligodendrogenesis and myelination in the optic nerve and lateral geniculate nucleus of adult control and Myrf cKO mice.** (A) Example images of myelin (MBP) and example images/quantification of mature oligodendrocytes (ASPA) in optic nerve. (B) Example images of myelin and and example images/quantification of mature oligodendrocytes in lateral geniculate nucleus. Statistical details in Table S1. \* $p < 0.05$ , ns = not significant.

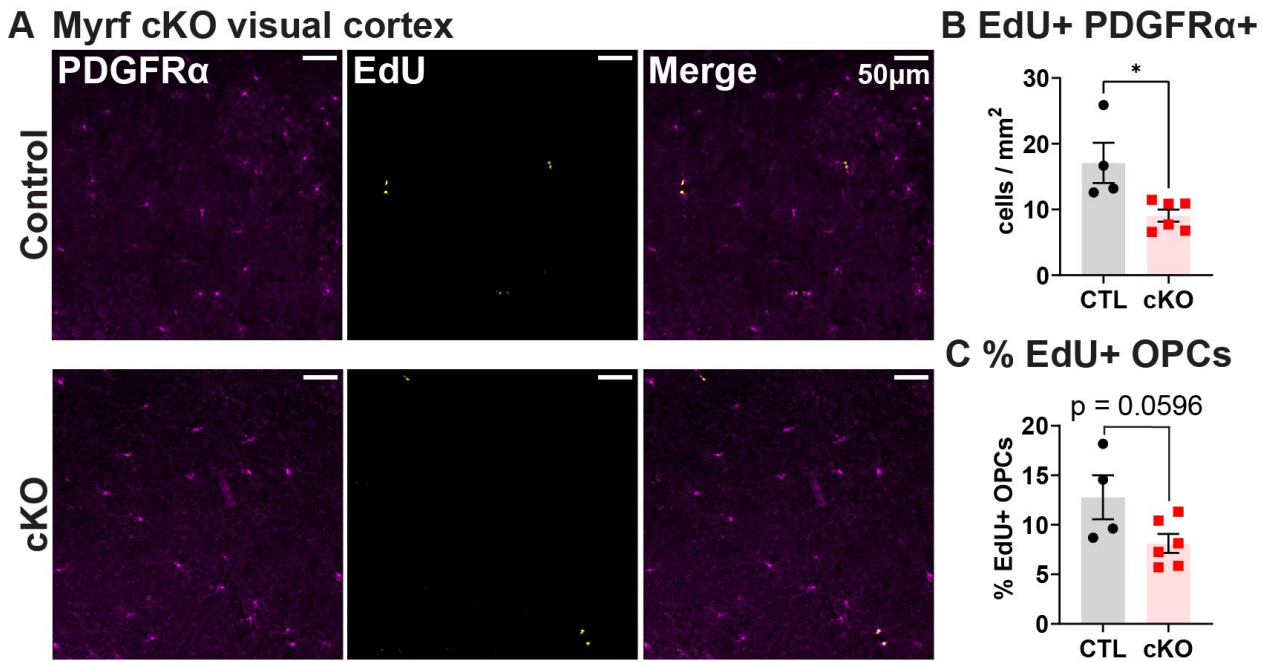

**Fig. S4.**

**OPC proliferation in visual cortex of adult control and Myrf cKO mice.** (A) Example images of OPCs (PDGFRα) and EdU labeling in visual cortex. (B) Quantification of PDGFRα<sup>+</sup> EdU<sup>+</sup> OPCs in visual cortex. (C) Quantification of percentage of PDGFRα<sup>+</sup> OPCs that were EdU<sup>+</sup> in visual cortex. Statistical details in Table S1. \*p<0.05.

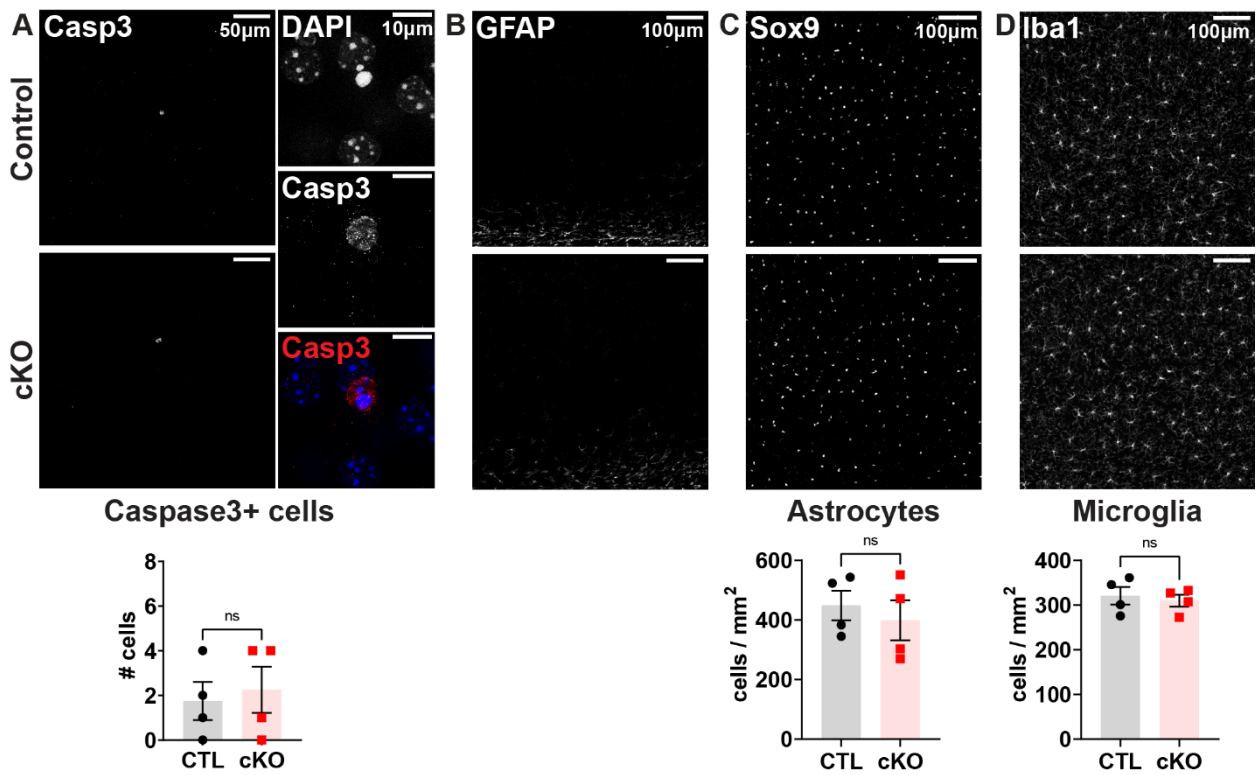

**Fig. S5.**

**Cell death, astrocyte density, and microglia density in adult control and Myrf cKO mice. (A)** Example images and quantification of Caspase<sup>+</sup> cells in visual cortex. **(B)** Example images of GFAP immunostaining in visual cortex. **(C)** Example images and quantification of Sox9<sup>+</sup> astrocytes in visual cortex. **(D)** Example images and quantification of Iba1<sup>+</sup> microglia in visual cortex. Statistical details in Table S1. ns = not significant.



### A Spinal cord demyelination

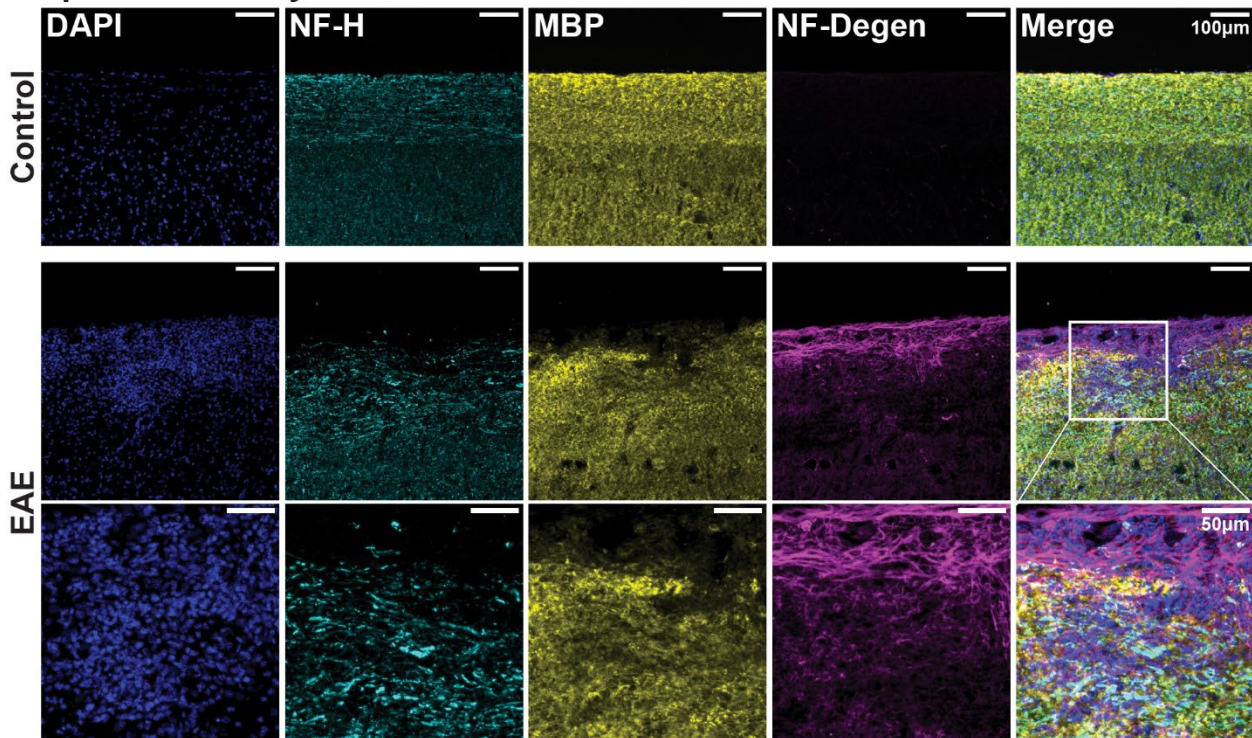

### B Visual cortex Myrf cKO

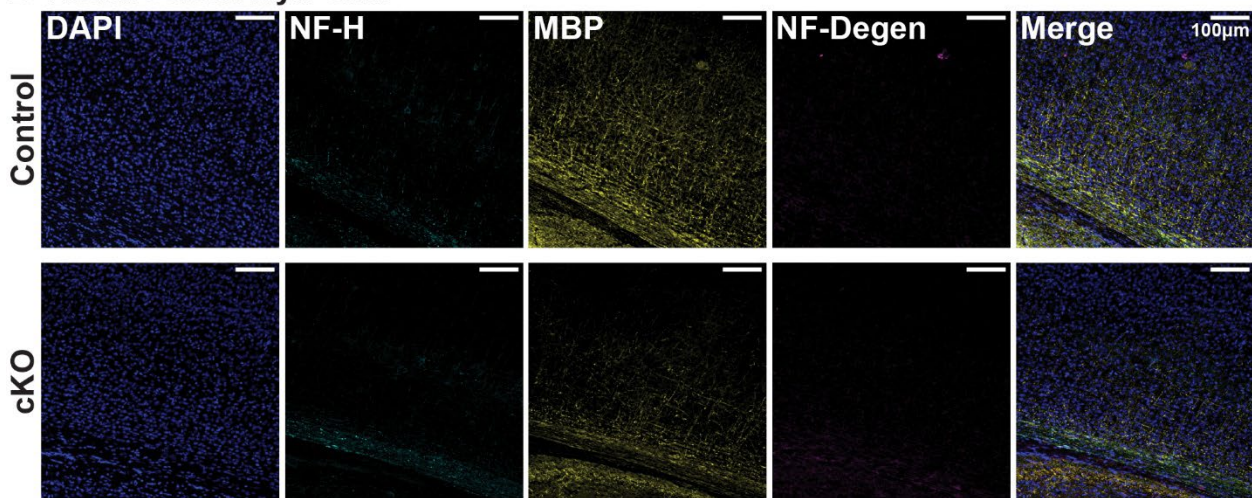

Fig. S6.

**Assessing neurodegeneration in demyelination and in Myrf cKO mice.** (A) Immunostaining for neurofilament H (NF-H), myelin basic protein (MBP), and neurofilament light chain DegenTag (NF-Degen) in spinal cords of control mice and mice that underwent experimental autoimmune encephalomyelitis (EAE). Disordered NF-H and prominent NF-Degen signal can be detected in the spinal cord of EAE mice, most notably in regions of demyelination. (B) Immunostaining for NF-H, MBP, and NF-Degen in visual cortex of control and Myrf cKO mice.

## A Retinotopic organization in primary visual cortex

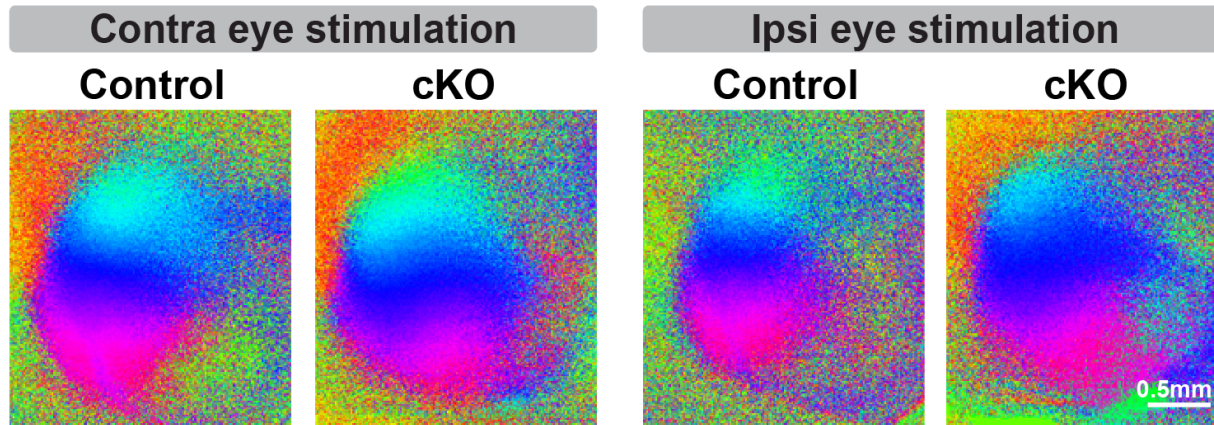

## B Contra eye response

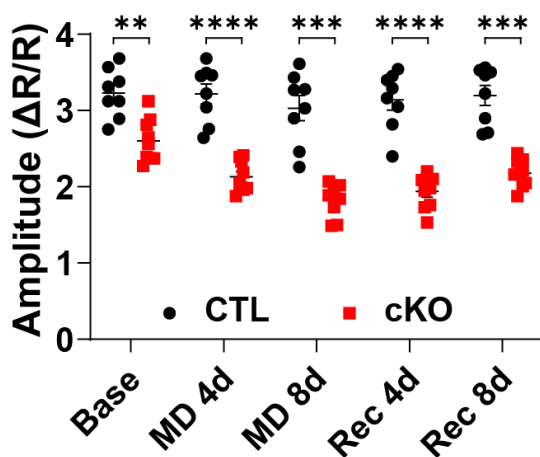

## C Ipsi eye response

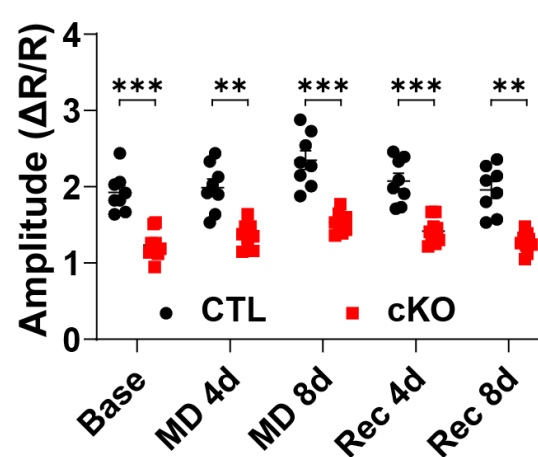

Fig. S7.

**Retinotopic organization and amplitude of visual cortex responses to visual stimulation in adult control and *Myrf* cKO mice.** (A) Example intrinsic signal images of retinotopy in primary visual cortex. (B, C) Amplitude of intrinsic signal imaging responses to stimulation of the contralateral deprived eye (contra) or ipsilateral non-deprived eye (ipsi) in binocular visual cortex of control (CTL) and cKO mice. Statistical details in Table S1. \*\* $p < 0.01$ , \*\*\* $p < 0.001$ , \*\*\*\* $p < 0.0001$ .



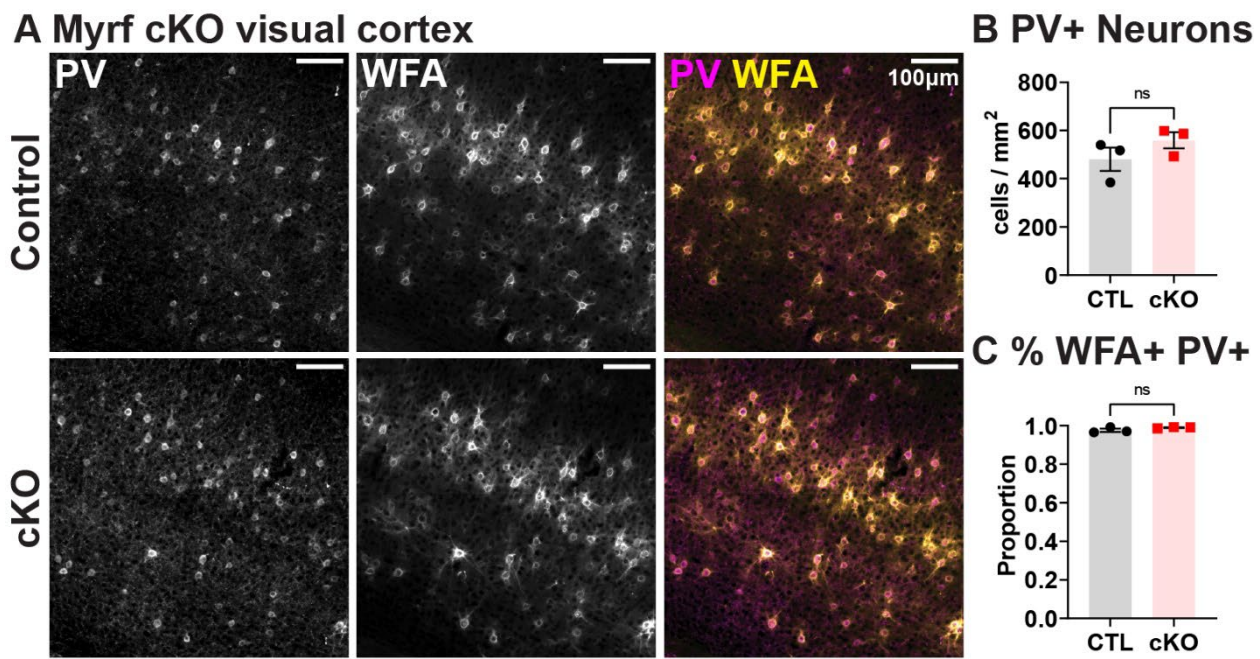

**Fig. S8.**

**Parvalbumin neuron density and perineuronal net coverage in adult control and Myrf cKO mice. (A)** Example images and quantification (**B, C**) of immunostaining for parvalbumin (PV) and perineuronal nets (WFA) in adult visual cortex of control (CTL) and cKO mice. Statistical details in Table S1. ns = not significant.



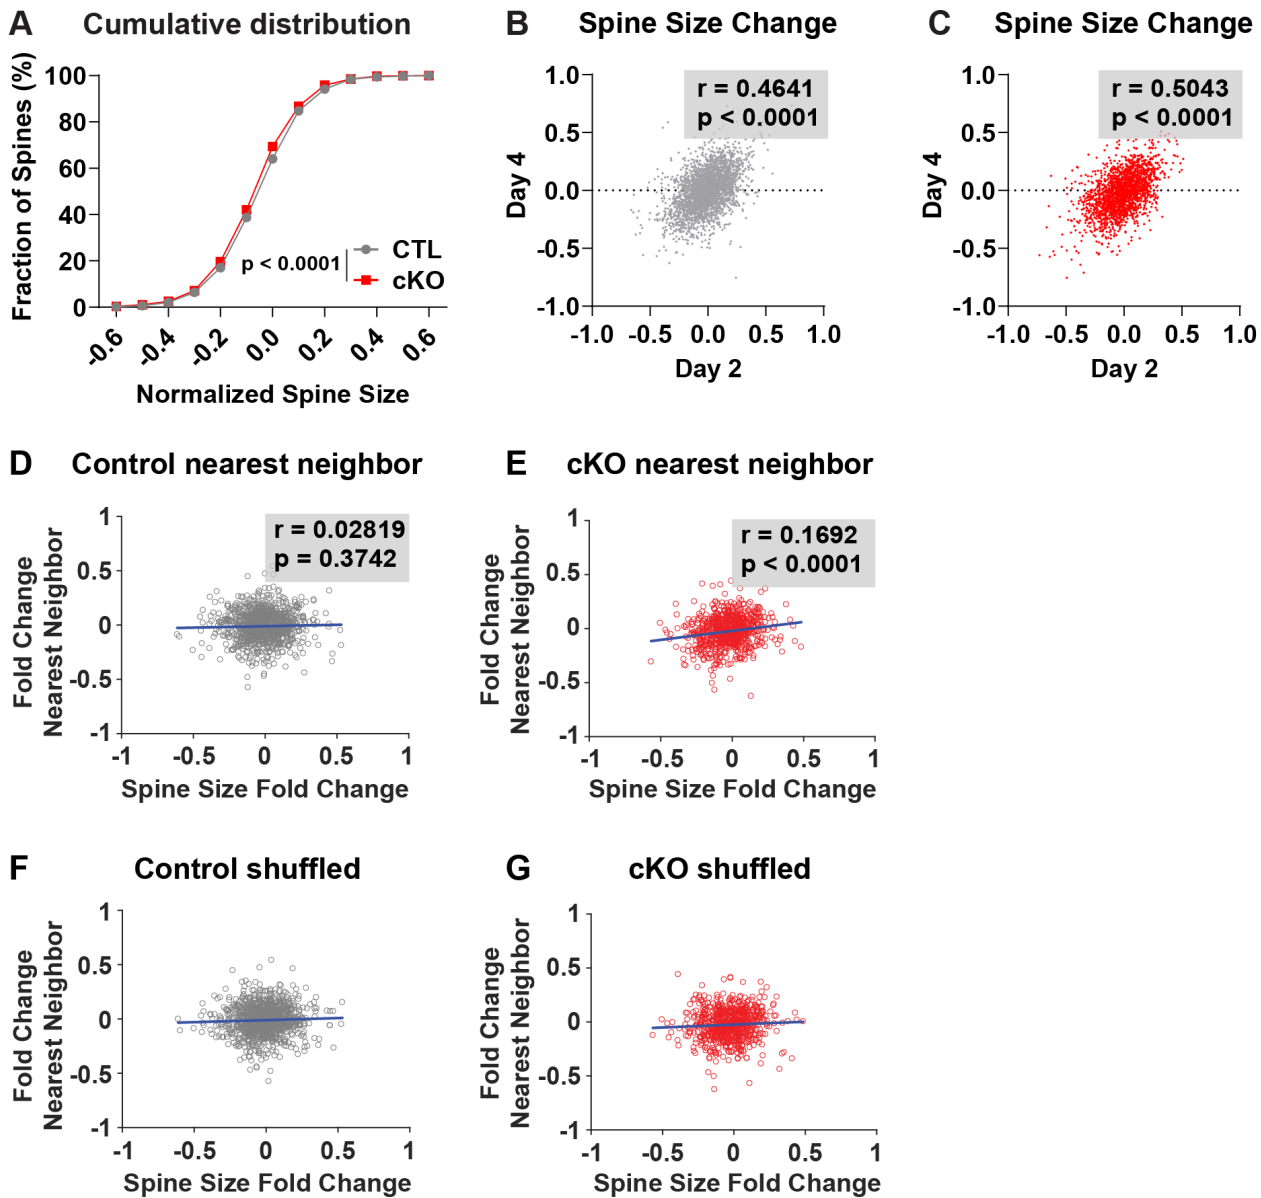

**Fig. S9.**

**Spine size changes following monocular deprivation in adult control and Myrf cKO mice.** (A) Cumulative distribution plot of spine size changes in control (CTL) and cKO mice after four days of monocular deprivation. (B, C) Correlation of spine size changes after two days of monocular deprivation with spine size changes after four days of monocular deprivation in control and cKO mice. (D, E) Correlation of average size change following monocular deprivation for a given spine and size change of its nearest neighbor in control and cKO mice. (F, G) Example correlation of nearest neighbor spine changes in one set of shuffled spine pairings for control and cKO mice. Statistical details in Table S1.

**Table S1.****Statistical analysis**

| <b>Figure</b> | <b>Sample size</b>             | <b>Statistical test</b>                                                                                              | <b>Values</b>                                                                                                                                                                                                                                        |
|---------------|--------------------------------|----------------------------------------------------------------------------------------------------------------------|------------------------------------------------------------------------------------------------------------------------------------------------------------------------------------------------------------------------------------------------------|
| 1H            | 8 mice                         | Paired t-test (two-tailed)                                                                                           | t = 5.494, p = 0.0009                                                                                                                                                                                                                                |
| 1I            | 8 mice                         | Paired t-test (two-tailed)                                                                                           | t = 3.06, p = 0.0183                                                                                                                                                                                                                                 |
| 1J            | 8 mice                         | Paired t-test (two-tailed)                                                                                           | t = 0.3199, p = 0.7584                                                                                                                                                                                                                               |
| 1K            | 8 mice                         | Paired t-test (two-tailed)                                                                                           | t = 3.84, p = 0.0064                                                                                                                                                                                                                                 |
| 1L            | 5 mice                         | Paired t-test (two-tailed)                                                                                           | t = 3.867, p = 0.018                                                                                                                                                                                                                                 |
| 1M            | 5 mice                         | Paired t-test (two-tailed)                                                                                           | t = 1.64, p = 0.1763                                                                                                                                                                                                                                 |
| 2B            | 3-6 mice per age, per genotype | Two-way ANOVA followed by Sidak's multiple comparisons test                                                          | Genotype:<br>F = 165.9, p < 0.0001<br>Interaction:<br>F = 9.55, p = 0.0002<br><br>CTL – cKO<br>P28: p = 0.1808<br>P35: p < 0.0001<br>P45: p < 0.0001<br>P60: p < 0.0001                                                                              |
| 2C            | 3-4 mice per age, per genotype | Two-way ANOVA followed by Sidak's multiple comparisons test                                                          | Genotype:<br>F = 0.7504, p = 0.7504<br>Interaction:<br>F = 0.0979, p = 0.7608<br><br>CTL vs cKO<br>P28: p > 0.9999<br>P60: p = 0.8672                                                                                                                |
| 2I            | 8-9 mice per genotype          | Two-way ANOVA followed by Sidak's multiple comparisons test                                                          | Genotype:<br>F = 30.64, p < 0.0001<br>Interaction:<br>F = 0.4264, p = 0.5237                                                                                                                                                                         |
| 2J            | 8 mice                         | Two one-way repeated measures ANOVAs (one for contra and one for ipsi) followed by Tukey's multiple comparisons test | Contra<br>F = 1.733, p = 0.1804<br>Baseline vs MD4: p = 0.9863<br>Baseline vs MD8: p = 0.1922<br>MD4 vs MD8: p = 0.1814<br><br>Ipsi<br>F = 30.17, p < 0.0001<br>Baseline vs MD4: p = 0.5364<br>Baseline vs MD8: p = 0.0004<br>MD4 vs MD8: p = 0.0015 |
| 2K            | 9 mice                         | Two one-way repeated measures ANOVAs (one for contra and one for ipsi) followed by Tukey's multiple comparisons test | Contra<br>F = 66.55, p < 0.0001<br>Baseline vs MD4: p = 0.0002<br>Baseline vs MD8: p < 0.0001<br>MD4 vs MD8: p = 0.0015<br><br>Ipsi<br>F = 20.66, p < 0.0001<br>Baseline vs MD4: p = 0.0575<br>Baseline vs MD8: p = 0.0013<br>MD4 vs MD8: p = 0.0053 |
| 2L            | 8-9 mice per genotype          | Unpaired t-test (two-tailed)                                                                                         | t = 5.082, p = 0.0001                                                                                                                                                                                                                                |



|    |                                                                   |                                                                                    |                                                                                                                                                                                     |
|----|-------------------------------------------------------------------|------------------------------------------------------------------------------------|-------------------------------------------------------------------------------------------------------------------------------------------------------------------------------------|
| 2M | 8-9 mice per genotype                                             | Two-way ANOVA followed by Sidak's multiple comparisons test                        | Genotype:<br>F = 36.22, p < 0.0001<br>Interaction:<br>F = 15.62, p < 0.0001<br><br>CTL vs cKO<br>MD 4d: p = 0.0003<br>MD 8d: p = 0.0007<br>Rec 4d: p = 0.0002<br>Rec 8d: p = 0.0013 |
| 2N | 8-9 mice per genotype                                             | Two-way ANOVA followed by Sidak's multiple comparisons test                        | Genotype:<br>F = 1.247, p = 0.3008<br>Interaction:<br>F = 1.922, p = 0.1859<br><br>CTL vs cKO<br>MD 4d: p = 0.5115<br>MD 8d: p = 0.9725<br>Rec 4d: p = 0.2595<br>Rec 8d: p = 0.9961 |
| 3D | 10 control mice (111 dendrites)<br><br>10 cKO mice (97 dendrites) | Two-way repeated measures ANOVA followed by Holm-Sidak's multiple comparisons test | Genotype:<br>F = 7.394, p = 0.0071<br>Interaction:<br>F = 2.115, p = 0.0972<br><br>CTL vs cKO<br>Day -2: p = 0.0311<br>Day 0: p = 0.0103<br>Day 2: p = 0.0095<br>Day 4: p = 0.0391  |
| 3E | 10 control mice (111 dendrites)<br><br>10 cKO mice (97 dendrites) | Mixed-effects analysis (REML) followed by Holm-Sidak's multiple comparisons test   | Genotype:<br>F = 8.82, p = 0.0033<br>Interaction:<br>F = 0.6344, p = 0.5931<br><br>CTL vs cKO<br>Day -2: p = 0.3037<br>Day 0: p = 0.0103<br>Day 2: p = 0.0178<br>Day 4: p = 0.0586  |
| 3F | 10 control mice (111 dendrites)<br><br>10 cKO mice (97 dendrites) | Mixed-effects analysis (REML) followed by Holm-Sidak's multiple comparisons test   | Genotype:<br>F = 13.9, p = 0.0002<br>Interaction:<br>F = 1.101, p = 0.3484<br><br>CTL vs cKO<br>Day -2: p = 0.0288<br>Day 0: p = 0.0048<br>Day 2: p = 0.0521<br>Day 4: p = 0.192    |
| 3G | 10 control mice (111 dendrites)<br><br>10 cKO mice (97 dendrites) | Mixed-effects analysis (REML) followed by Holm-Sidak's multiple comparisons test   | Genotype:<br>F = 3.483, p = 0.0634<br>Interaction:<br>F = 0.9613, p = 0.4107                                                                                                        |

|    |                                                                    |                                                                                                        |                                                                                                                                                                                                     |
|----|--------------------------------------------------------------------|--------------------------------------------------------------------------------------------------------|-----------------------------------------------------------------------------------------------------------------------------------------------------------------------------------------------------|
|    |                                                                    |                                                                                                        | CTL vs cKO<br>Day -2: $p = 0.7148$<br>Day 0: $p = 0.2422$<br>Day 2: $p = 0.1721$<br>Day 4: $p = 0.1721$                                                                                             |
| 3H | 10 control mice (111 dendrites)<br><br>10 cKO mice (97 dendrites)  | Two-way repeated measures ANOVA followed by Holm-Sidak's multiple comparisons test                     | Genotype:<br>$F = 2.471$ , $p = 0.1175$<br>Interaction:<br>$F = 2.64$ , $p = 0.0486$<br><br>CTL vs cKO<br>Day -2: $p = 0.7333$<br>Day 0: $p = 0.7241$<br>Day 2: $p = 0.9743$<br>Day 4: $p = 0.0110$ |
| 4C | 10 control mice (110 dendrites)<br><br>10 cKO mice (96 dendrites)  | Unpaired t-test (two-tailed)                                                                           | $t = 0.3287$ , $p = 0.7427$                                                                                                                                                                         |
| 4D | 10 control mice (110 dendrites)<br><br>10 cKO mice (96 dendrites)  | Unpaired t-test (two-tailed)                                                                           | $t = 2.826$ , $p = 0.0052$                                                                                                                                                                          |
| 4E | 10 control mice (110 dendrites)<br><br>10 cKO mice (96 dendrites)  | Unpaired t-test (two-tailed)                                                                           | $t = 2.56$ , $p = 0.0112$                                                                                                                                                                           |
| 4F | 10 control mice (110 dendrites)<br><br>10 cKO mice (96 dendrites)  | Unpaired t-test (two-tailed)                                                                           | $t = 1.627$ , $p = 0.1052$                                                                                                                                                                          |
| 4G | 10 control mice (996 spine pairs)<br>10 cKO mice (704 spine pairs) | Monte Carlo p value calculated by summing the tail of the histogram from 10000 shuffled spine pairings | $p = 0.686$                                                                                                                                                                                         |
| 4H | 10 control mice (996 spine pairs)<br>10 cKO mice (704 spine pairs) | Monte Carlo p value calculated by summing the tail of the histogram from 10000 shuffled spine pairings | $p = 0.939$                                                                                                                                                                                         |
| 4I | 10 control mice (996 spine pairs)<br>10 cKO mice (704 spine pairs) | Monte Carlo p value calculated by summing the tail of the histogram from 10000 shuffled spine pairings | $p = 0.913$                                                                                                                                                                                         |
| 4J | 10 control mice (996 spine pairs)<br>10 cKO mice (704 spine pairs) | Monte Carlo p value calculated by summing the tail of the histogram from 10000 shuffled spine pairings | $p = 0.66$                                                                                                                                                                                          |



|     |                                                                    |                                                                                                        |                                                                                                                                                                                                        |
|-----|--------------------------------------------------------------------|--------------------------------------------------------------------------------------------------------|--------------------------------------------------------------------------------------------------------------------------------------------------------------------------------------------------------|
| 4K  | 10 control mice (996 spine pairs)<br>10 cKO mice (704 spine pairs) | Monte Carlo p value calculated by summing the tail of the histogram from 10000 shuffled spine pairings | p = 0.862                                                                                                                                                                                              |
| 4L  | 10 control mice (996 spine pairs)<br>10 cKO mice (704 spine pairs) | Monte Carlo p value calculated by summing the tail of the histogram from 10000 shuffled spine pairings | p = 0.001                                                                                                                                                                                              |
| 4M  | 10 control mice (996 spine pairs)<br>10 cKO mice (704 spine pairs) | Monte Carlo p value calculated by summing the tail of the histogram from 10000 shuffled spine pairings | p = 0.002                                                                                                                                                                                              |
| 4N  | 10 control mice (996 spine pairs)<br>10 cKO mice (704 spine pairs) | Monte Carlo p value calculated by summing the tail of the histogram from 10000 shuffled spine pairings | p = 0.022                                                                                                                                                                                              |
| S1B | 8 mice                                                             | Paired t-test (two-tailed)                                                                             | t = 2.565, p = 0.0373                                                                                                                                                                                  |
| S1C | 8 mice                                                             | Paired t-test (two-tailed)                                                                             | t = 2.176, p = 0.066                                                                                                                                                                                   |
| S1F | 5 mice                                                             | Paired t-test (two-tailed)                                                                             | t = 3.637, p = 0.022                                                                                                                                                                                   |
| S3A | 4-6 mice per genotype                                              | Unpaired t-test (two-tailed)                                                                           | t = 0.1984, p = 0.8477                                                                                                                                                                                 |
| S3B | 4-5 mice per genotype                                              | Unpaired t-test (two-tailed)                                                                           | t = 3.461, p = 0.0105                                                                                                                                                                                  |
| S4B | 4-6 mice per genotype                                              | Unpaired t-test (two-tailed)                                                                           | t = 2.982, p = 0.0176                                                                                                                                                                                  |
| S4C | 4-6 mice per genotype                                              | Unpaired t-test (two-tailed)                                                                           | t = 2.195, p = 0.0594                                                                                                                                                                                  |
| S5A | 4 mice per genotype                                                | Unpaired t-test (two-tailed)                                                                           | t = 0.3735, p = 0.7216                                                                                                                                                                                 |
| S5C | 4 mice per genotype                                                | Unpaired t-test (two-tailed)                                                                           | t = 0.595, p = 0.5736                                                                                                                                                                                  |
| S5D | 4 mice per genotype                                                | Unpaired t-test (two-tailed)                                                                           | t = 0.4586, p = 0.6627                                                                                                                                                                                 |
| S7B | 8-9 mice per genotype                                              | Two-way ANOVA followed by Sidak's multiple comparisons test                                            | Genotype:<br>F = 55.3, p < 0.0001<br>Interaction:<br>F = 11.73, p < 0.0001<br><br>CTL vs cKO<br>Base: p = 0.0041<br>MD 4d: p < 0.0001<br>MD 8d: p = 0.0004<br>Rec 4d: p < 0.0001<br>Rec 8d: p = 0.0002 |
| S7C | 8-9 mice per genotype                                              | Two-way ANOVA followed by Sidak's multiple comparisons test                                            | Genotype:<br>F = 42.31, p < 0.0001<br>Interaction:<br>F = 2.183, p = 0.0816<br><br>CTL vs cKO<br>Base: p = 0.0002                                                                                      |

|        |                                                            |                                                                                                 |                                                                                            |
|--------|------------------------------------------------------------|-------------------------------------------------------------------------------------------------|--------------------------------------------------------------------------------------------|
|        |                                                            |                                                                                                 | MD 4d: $p = 0.0022$<br>MD 8d: $p = 0.0008$<br>Rec 4d: $p = 0.0009$<br>Rec 8d: $p = 0.0011$ |
| S8B    | 3 mice per genotype                                        | Unpaired t-test (two-tailed)                                                                    | $t = 1.331$ , $t = 0.2538$                                                                 |
| S8C    | 3 mice per genotype                                        | Unpaired t-test (two-tailed)                                                                    | $t = 1.635$ , $t = 0.1773$                                                                 |
| S9A    | 10 control mice (3484 spines)<br>10 cKO mice (2438 spines) | Kolmogorov-Smirnov test                                                                         | $p < 0.0001$                                                                               |
| S9B    | 10 control mice (3809 spines)                              | Pearson r correlation                                                                           | $r = 0.4641$ , $p < 0.0001$                                                                |
| S9C    | 10 cKO mice (3484 spines)                                  | Pearson r correlation                                                                           | $r = 0.5043$ , $p < 0.0001$                                                                |
| S9D    | 10 control mice (996 spine pairs)                          | Pearson r correlation                                                                           | $r = 0.02819$ , $p = 0.3742$                                                               |
| S9E    | 10 cKO mice (704 spine pairs)                              | Pearson r correlation                                                                           | $r = 0.1692$ , $p < 0.0001$                                                                |
| S9F, G | N/A                                                        | Example of one shuffled spine pairing as part of Monte Carlo simulation; no statistics involved | N/A                                                                                        |



**Table S2.****Primary antibodies**

| <b>Antibody</b>              | <b>Source</b>  | <b>Identifier</b>                 | <b>Concentration</b> |
|------------------------------|----------------|-----------------------------------|----------------------|
| Rabbit anti-ASPA             | GeneTex        | Cat# GTX113389; RRID AB_2036283   | 1:1000               |
| Chicken anti-GFP             | Rockland       | Cat# 600-901-215; RRID AB_1537403 | 1:1000               |
| Rat anti-MBP                 | Millipore      | Cat# MAB386; RRID AB_94975        | 1:200                |
| Rabbit anti-PDGFR $\alpha$   | W.B. Stallcup  | N/A                               | 1:200                |
| Rabbit anti-cleaved Caspase3 | Cell Signaling | Cat# 9661S; RRID AB_2341188       | 1:200                |
| Mouse anti-GFAP              | Millipore      | Cat# MAB360; RRID AB_11212597     | 1:1000               |
| Goat anti-Sox9               | R&D Systems    | Cat# AF3075; RRID AB_2194160      | 1:2000               |
| Rabbit anti-Iba1             | Wako           | Cat# 019-19741; RRID AB_839504    | 1:1000               |
| Mouse anti-NF-L Degenotag    | Encor          | Cat# MCA-1D44; RRID AB_2923483    | 1:1000               |
| Rabbit anti-NF-H             | Abcam          | Cat# ab8135; RRID AB_306298       | 1:1000               |
| Mouse anti-PV                | Swant          | Cat# 235; RRID AB_10000343        | 1:1000               |
| Biotinylated WFA             | Vector Labs    | Cat# B-1355; RRID AB_2336874      | 1:400                |
